# Supplementary material for: Colloidal stability of reduced graphene oxide materials prepared using different reducing agents
Source: Royal Society of Chemistry journal article supplement (doi:10.1039/c6en00174b), 2016-01-01
Supplement: c6en00174b1.pdf [file c6en00174b1.pdf]

## **Supplemental Data**

### **Colloidal Stability of Reduced Graphene Oxide Materials Prepared Using Different Reducing Agents**

Yu Qi, Tianjiao Xia, Yao Li, Lin Duan, Wei Chen\*

College of Environmental Science and Engineering, Ministry of Education Key  
Laboratory of Pollution Processes and Environmental Criteria, Tianjin Key Laboratory of  
Environmental Remediation and Pollution Control, Nankai University, Wei Jin Road 94,  
Tianjin 300071, China

\* Corresponding author: Tel (Fax): +86 22-66229516; E-mail address:

[chenwei@nankai.edu.cn](mailto:chenwei@nankai.edu.cn)

### **Procedures used to determine relative hydrophobicity of GO and RGO**

Relative hydrophobicity of GO and RGOs was assessed using a hydrocarbon partitioning test with laboratory-grade *n*-dodecane <sup>S1</sup>. Samples were prepared by adding 4 ml of a GO suspension to a test tube containing 1 ml of *n*-dodecane. The test tube was vortexed for 2 min, and then left undisturbed for 15 min to allow phase separation. The relative hydrophobicity was assessed as the fraction of GO that partitioned into *n*-dodecane from the aqueous phase <sup>S2</sup>.

**Table S1** Ion compositions of artificial surface and ground waters.

| Ion type                      | Artificial surface water | Artificial ground water |
|-------------------------------|--------------------------|-------------------------|
|                               | Concentration (mM)       | Concentration (mM)      |
| Na <sup>+</sup>               | 0.23                     | 0.43                    |
| K <sup>+</sup>                | 0.03                     | 0.20                    |
| Ca <sup>2+</sup>              | 0.33                     | 0.68                    |
| Mg <sup>2+</sup>              | 0.15                     | 0.24                    |
| Cl <sup>-</sup>               | 0.16                     | 0.64                    |
| NO <sub>3</sub> <sup>-</sup>  | -                        | 0.62                    |
| HCO <sub>3</sub> <sup>-</sup> | 0.92                     | 0.45                    |
| SO <sub>4</sub> <sup>2-</sup> | 0.07                     | 0.38                    |

**Table S2** Electrophoretic mobility of GO/RGOs in the absence and presence of SRHA.

|                                    | EPM (m <sup>2</sup> V <sup>-1</sup> s <sup>-1</sup> ) |                              |                              |
|------------------------------------|-------------------------------------------------------|------------------------------|------------------------------|
|                                    | 0.5 mM Ca <sup>2+</sup>                               | 0.5 mM Ca <sup>2+</sup> with | 0.5 mM Ca <sup>2+</sup> with |
|                                    |                                                       | 1 mg/L SRHA                  | 10 mg/L SRHA                 |
| GO                                 | -1.24 ± 0.06                                          | -1.27 ± 0.02                 | -1.34 ± 0.07                 |
| VC-RGO                             | -1.09 ± 0.15                                          | -1.11 ± 0.04                 | -1.31 ± 0.10                 |
| NaBH <sub>4</sub> -RGO             | -0.99 ± 0.01                                          | -1.00 ± 0.04                 | -1.11 ± 0.07                 |
| N <sub>2</sub> H <sub>4</sub> -RGO | -0.91 ± 0.07                                          | -0.98 ± 0.04                 | -1.11 ± 0.01                 |

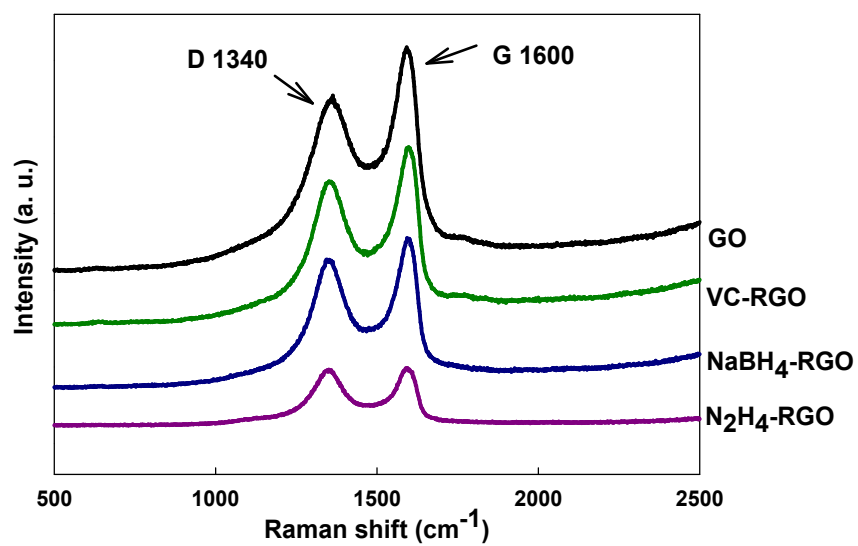

**Fig. S1** Raman spectra of GO and reduced GOs. All samples displayed strong Raman peaks at approximate  $1340\text{ cm}^{-1}$  (assigned to the D band) and  $1600\text{ cm}^{-1}$  (G band). The G band is ascribed to the  $E_{2g}$  mode of  $sp^2$  carbon atoms and the D band is usually related to the vibration of carbon atoms with dangling bonds and ascribed to the edge of carbon network<sup>S3</sup>.

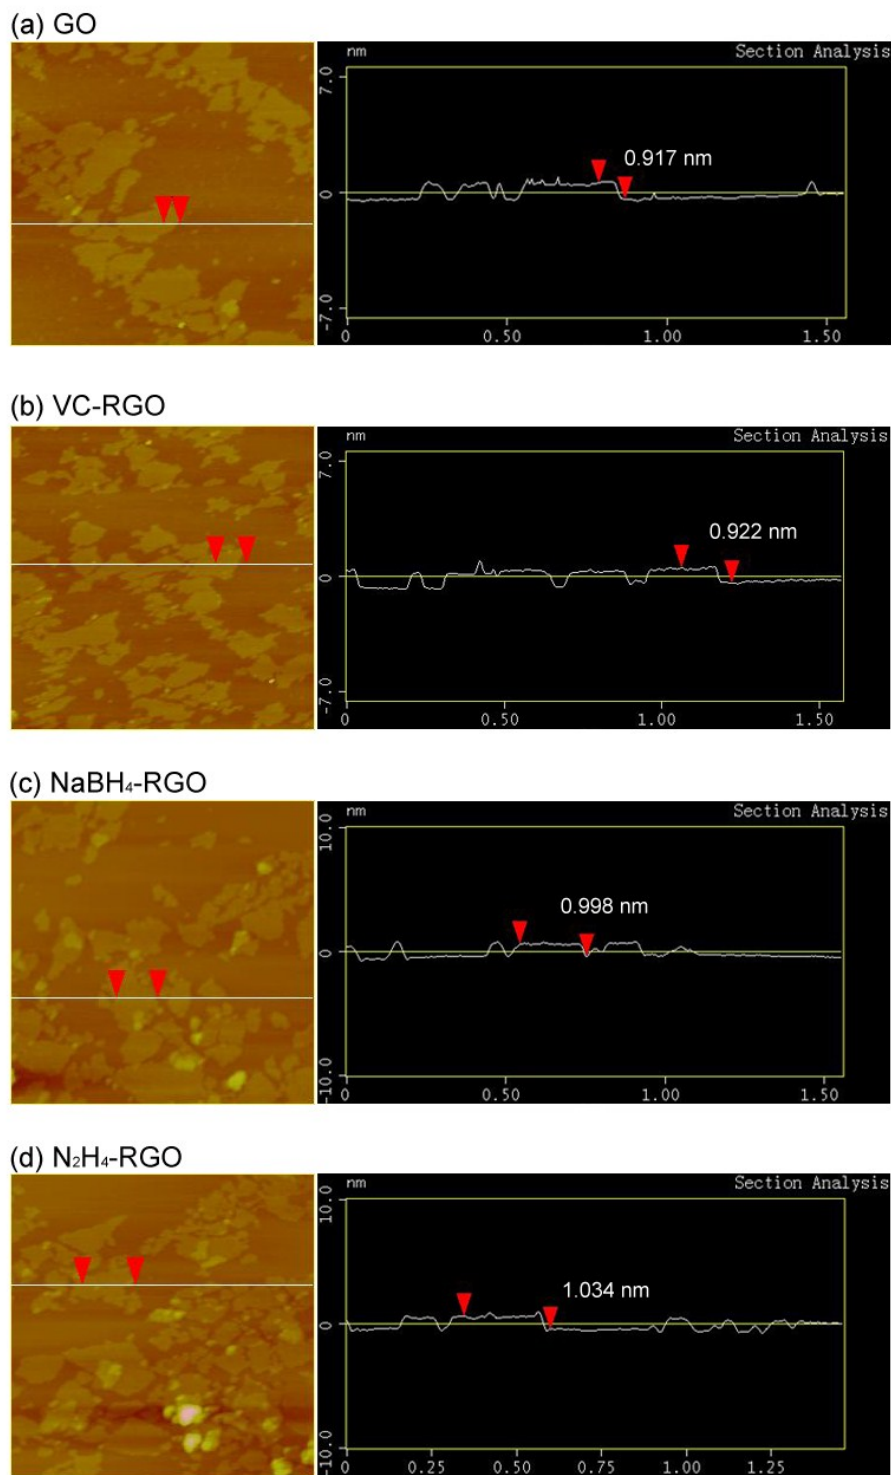

**Fig. S2** AFM images and height profiles of graphene oxide (GO) and reduced graphene oxides (VC-RGO, NaBH<sub>4</sub>-RGO and N<sub>2</sub>H<sub>4</sub>-RGO).

(a) GO

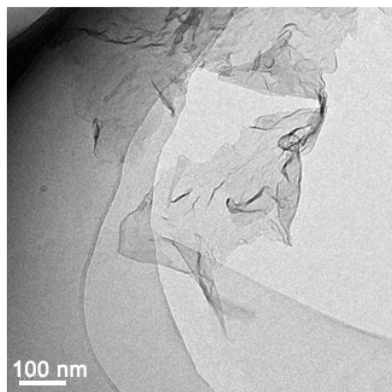

(b) VC-RGO

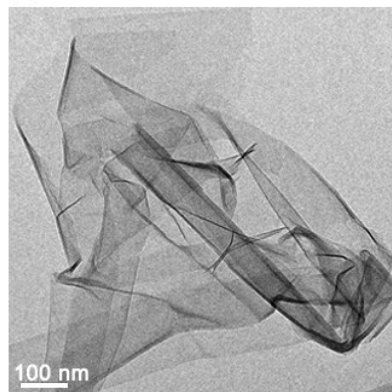

(c) NaBH<sub>4</sub>-RGO

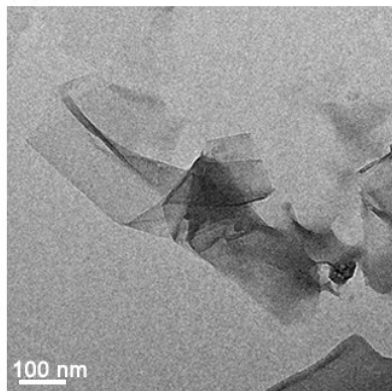

(d) N<sub>2</sub>H<sub>4</sub>-RGO

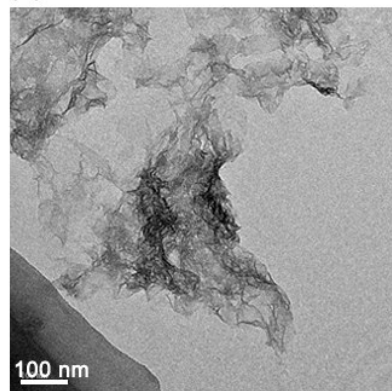

**Fig. S3** TEM images of graphene oxide (GO) and reduced graphene oxides (VC-RGO, NaBH<sub>4</sub>-RGO and N<sub>2</sub>H<sub>4</sub>-RGO).

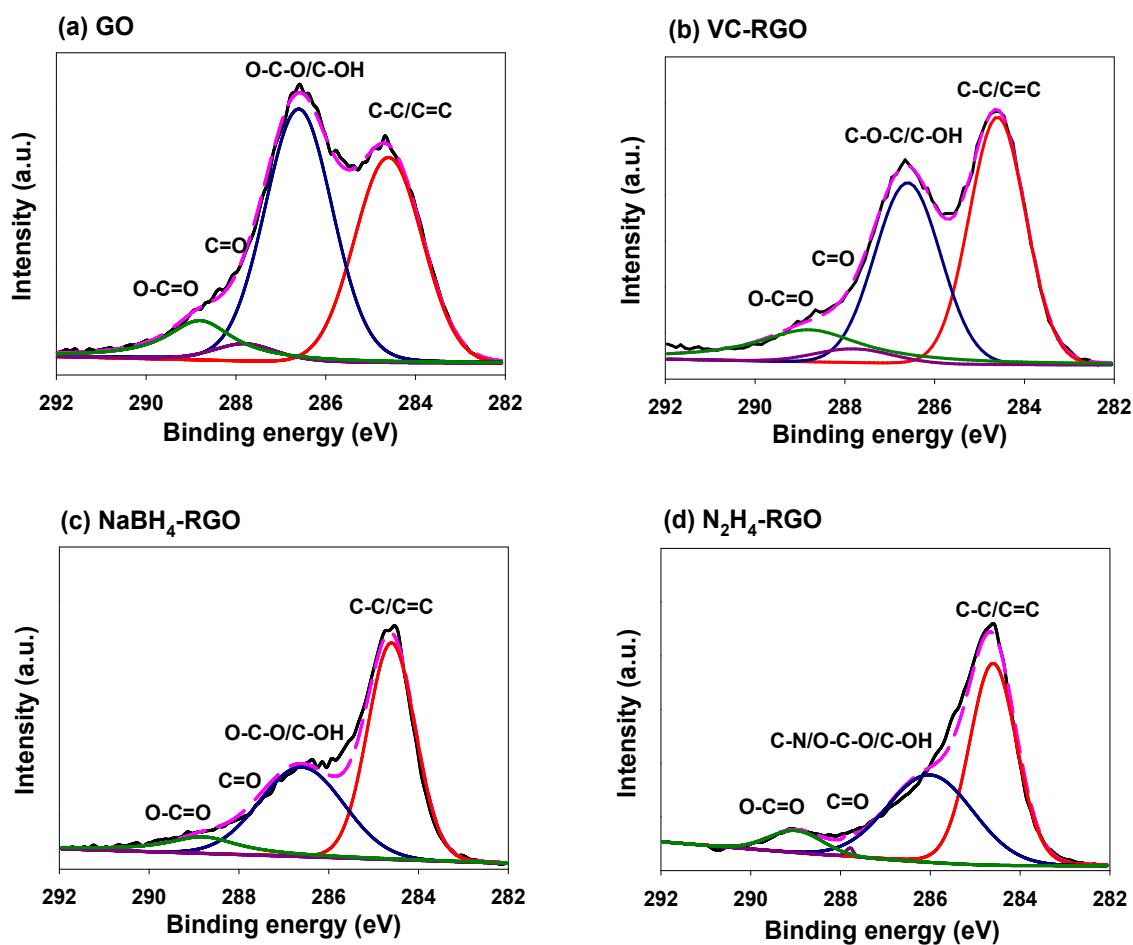

**Fig. S4** XPS spectra of graphene oxide (GO) and reduced GOs (VC-RGO, NaBH<sub>4</sub>-RGO and N<sub>2</sub>H<sub>4</sub>-RGO). The peaks with the binding energy of 284.6, 286.6, 287.8 and 288.8 eV are assigned to the carbon atoms in aromatic rings (C-C/C=C), epoxy/hydroxyl (C-O-C/C-OH), carbonyl (C=O) and carboxyl (O-C=O), respectively.

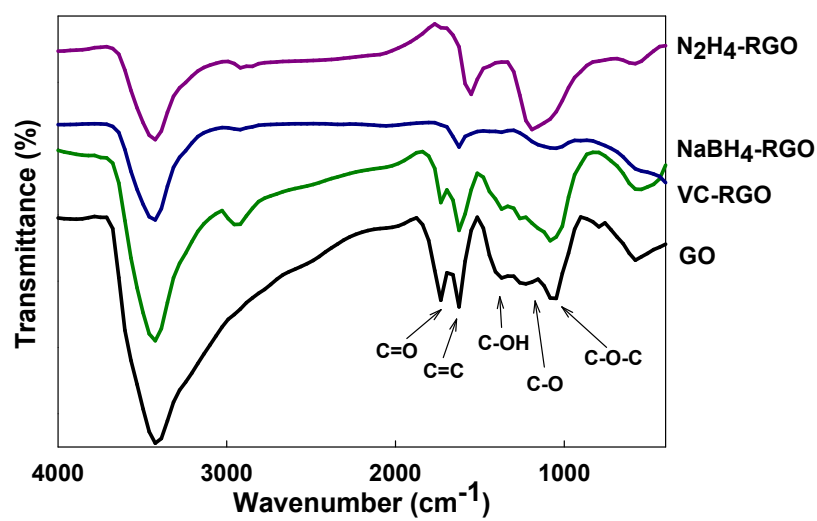

**Fig. S5** FTIR spectra of GO and reduced GOs, including VC-RGO, NaBH<sub>4</sub>-RGO and N<sub>2</sub>H<sub>4</sub>-RGO.



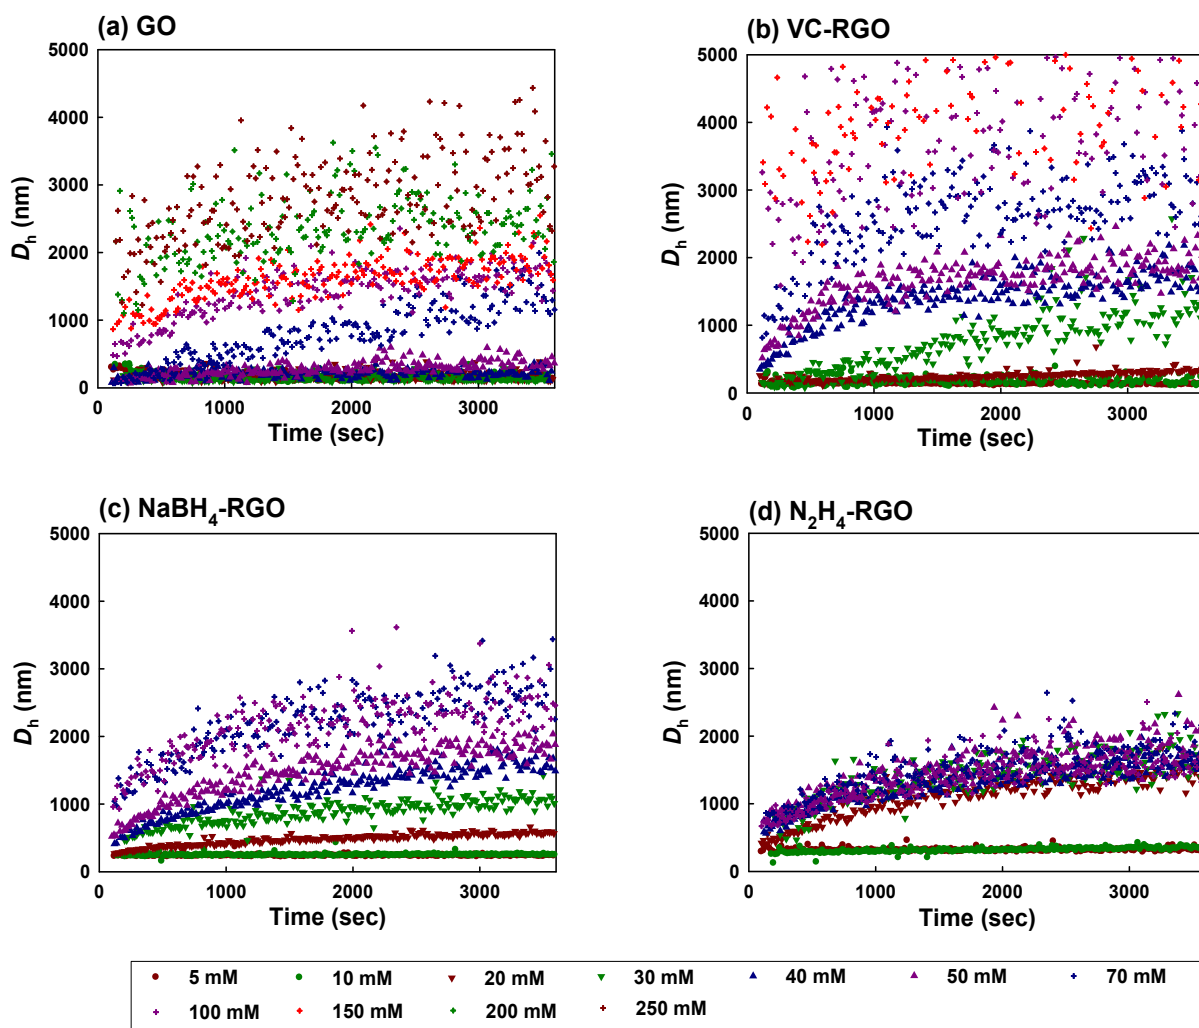

**Fig. S6** Aggregation kinetics of GO and reduced GOs (VC-RGO, NaBH<sub>4</sub>-RGO and N<sub>2</sub>H<sub>4</sub>-RGO) as a function of NaCl concentration. Aggregation of GO was studied over a NaCl concentration range of 5 to 250 mM, and that of RGOs was studied over 5 to 150 mM, due to the lower critical coagulation concentrations.

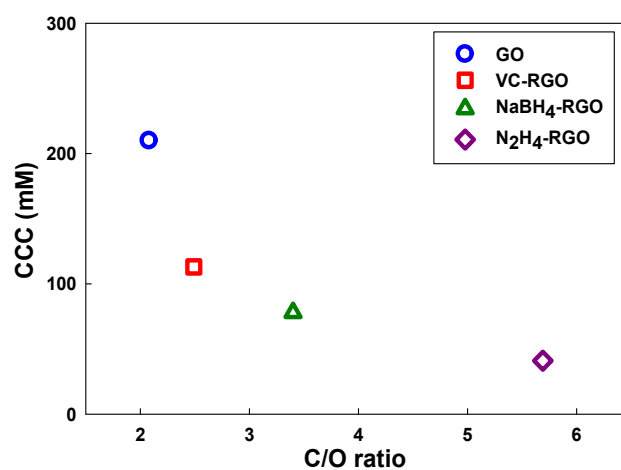

**Fig. S7** Correlation of critical coagulation concentration (CCC) values of GO and reduced GOs (VC-RGO, NaBH<sub>4</sub>-RGO and N<sub>2</sub>H<sub>4</sub>-RGO) with C/O ratios of the materials.

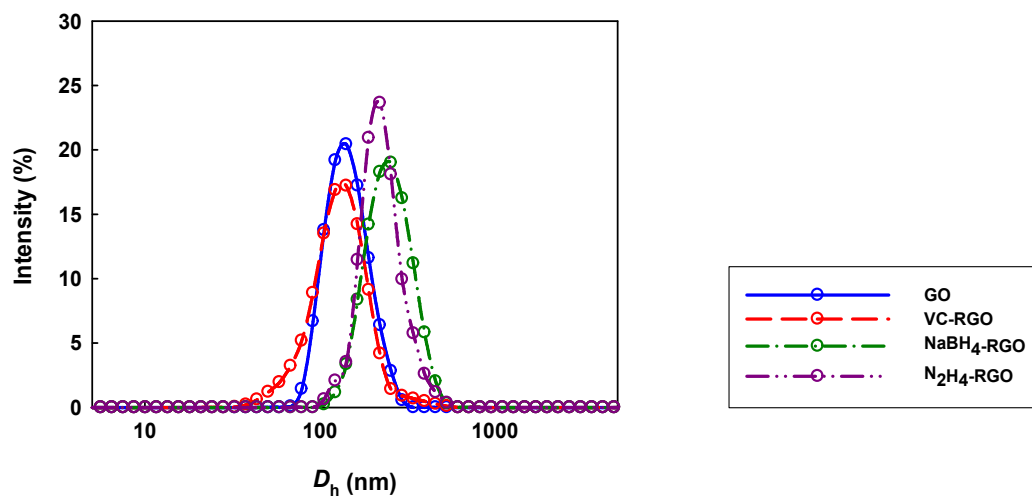

**Fig. S8** Particle size distribution of GO and reduced GOs (VC-RGO, NaBH<sub>4</sub>-RGO and N<sub>2</sub>H<sub>4</sub>-RGO) in deionized water.

## References

- S1 J. A. Brant, J. Labille, J. Y. Bottero, M. R. Wiesner, *Langmuir*, 2006, **22**, 3878-3885.
- S2 S. L. Walker, J. E. Hill, J. A. Redman, M. Elimelech, *Appl. Environ. Microb.*, 2005, **71**, 3093-3099.
- S3 A.C. Ferrari, J. Robertson, *Phys. Rev. B*, 2000, **61**, 14095–14107.
